# Supplementary material for: Chirality in Au9 clusters protected by chiral/achiral mixed bidentate phosphine ligands: influence of the metal core and ligand array
Source: Royal Society of Chemistry journal article supplement (doi:10.1039/c9cp02341k), 2019-01-01
Supplement: c9cp02341k1.pdf [file c9cp02341k1.pdf]

Electronic Supplementary Information (ESI) for *PCCP*

## Chirality in $\text{Au}_9$ clusters protected by chiral/achiral mixed bidentate phosphine ligands: Influence of the metal core and ligand array

Yasuhiko Sato, Masaki Mitani, and Hiroshi Yao\*

*Division of Chemistry for Materials, Graduate School of Engineering, Mie University, 1577 Kurimamachiya-cho, Tsu, Mie 514-8507, Japan*

**Average of optical or chiroptical responses calculated for isomer-I and isomer-II of  $[\text{Au}_9(\text{S-BDP})_4]^{3+}$  clusters.**

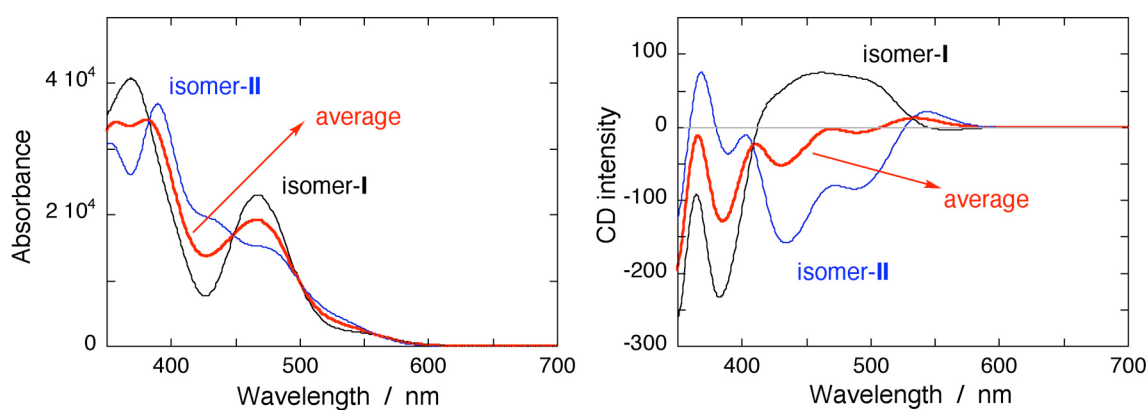

**Fig. S1.** Left or right figure indicates absorption and CD spectra of isomer-I, isomer-II and their average of  $[\text{Au}_9(\text{S-BDP})_4]^{3+}$  clusters, respectively.
